# Supplementary material
Source: Springer Nature journal article supplement (https://www.springermedizin.de/resource/supplementary/12936_2013_2869_MOESM7_ESM.pdf/9544488)

**A**

Cleaved caspase-3 expression

Neurons

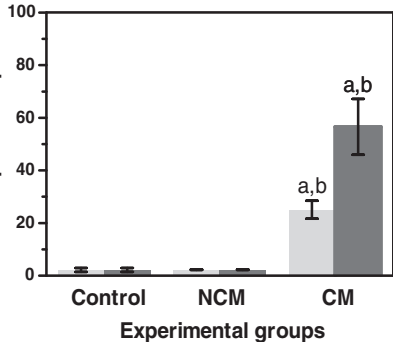 % positive cells Total score (% positive cells x intensity)**B**

Cleaved caspase-3 expression

Glial cells

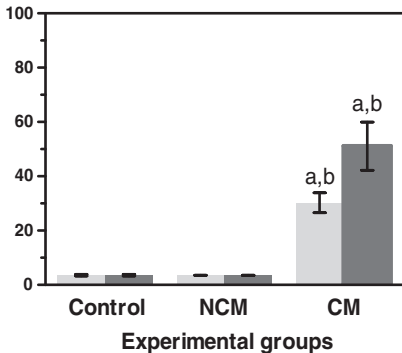

Supplement: MOESM7 [file 9544488]
